1 **Prevalence and incidence of stress, depression, and anxiety symptoms among Brazilians in**  
2 **quarantine across the early phases of the COVID-19 crisis**

3  
4

5 **Miguel Blacutt**

6 Department of Biobehavioral Sciences, Teachers College, Columbia University, USA

7 **Alberto Filgueiras**

8 Department of Cognition and Human Development, Rio de Janeiro State University, Brazil

9 **Matthew Stults-Kolehmainen**

10 Digestive Health Multispecialty Clinic, Yale – New Haven Hospital, New Haven, USA;

11 Department of Biobehavioral Sciences, Teachers College, Columbia University, USA

12  
13  
14

15 **Corresponding author**

16 Alberto Filgueiras

17 Universidade do Estado do Rio de Janeiro (UERJ), Rua São Francisco Xavier, 524, Bloco

18 F, Sala 10.015, Maracaña, Rio de Janeiro 20550-900, Brasil.

19 Email: [albertofilgueiras@gmail.com](mailto:albertofilgueiras@gmail.com)

20

21 **Abstract**

22 Objective: The present study aimed to measure the prevalence and incidence of stress, depression,  
23 and anxiety symptoms in Brazilians during the COVID-19 pandemic.

24 Method: We assessed 103 (54 women, 49 men) participants online in three periods of the  
25 pandemic: March 2020 (T1), April 2020 (T2), and June 2020 (T3). Prevalence and incidence were  
26 identified when mental health scores were two standard deviations above the mean compared to  
27 normative data. Mental health indicators were measured using the Perceived Stress Scale, the  
28 Filgueiras Depression Index, and the State-Trait Anxiety Inventory – State Subscale.

29 Results: At T1, 89% of individuals were below cut-off scores for stress, anxiety, and depression,  
30 which dropped to 35% by T3. Stress prevalence was 1.9% at T1, 7.8% at T2, and 28.2% at T3.  
31 Depression prevalence was 0% at T1, 23.3% at T2, and 25.2% at T3. State anxiety prevalence was  
32 10.7% at T1, 11.7% at T2, and 45.6% at T3. Stress incidence increased by 7.8% from T1 to T2,  
33 and 23.3% from T2 to T3. Depression incidence increased by 23.3% from T1 to T2, and 15.5%  
34 from T2 to T3. Anxiety incidence increased by 9.7% from T1 to T2, and 39.8% from T2 to T3.  
35 Stress severity scores significantly increased from  $16.1 \pm 8.7$  at T1 to  $23.5 \pm 8.4$  at T2, and  $30.3 \pm 6.0$   
36 at T3. Depression severity scores significantly increased from  $48.5 \pm 20.5$  at T1 to  $64.7 \pm 30.2$  at T2,  
37 and  $75.9 \pm 26.1$  at T3. Anxiety increased from  $49.0 \pm 13.4$  at T1 to  $53.5 \pm 12.5$  at T2 and  $62.3 \pm 13.4$  at  
38 T3. Females had significantly higher anxiety scores than males by T3 ( $66.7 \pm 11.8$  vs.  $57.4 \pm 13.5$ ).

39 Conclusion: Prevalence and incidence of stress, depression, and anxiety significantly increased  
40 throughout the pandemic. The largest increase in stress and anxiety occurred between T2 and T3,  
41 and between T1 and T2 for depression. Severity of stress, depression, and anxiety increased  
42 throughout the study.

43

## 44 **Introduction**

45           The COVID-19 pandemic began to escalate in Brazil in mid-March, 2020 with the  
46 confirmation of the first cases of community transmission (Brazil Ministry of Health, 2021).  
47 Researchers have been attempting to understand the mental health consequences of the COVID-  
48 19 crisis, as well as the environmental and behavioral factors that might be linked to psychological  
49 distress or other potential disorders. However, there is a lack of epidemiologic data for mental  
50 illness in Brazil in response to the emergence of COVID-19 (Filgueiras and Stults-Kolehmainen,  
51 2021; Goularte et al., 2021; Passos et al., 2020; Filgueiras and Stults-Kolehmainen, 2020).  
52 Understanding the prevalence and incidence of stress, depression, and anxiety symptoms among  
53 people in quarantine due to COVID-19 is pivotal as it sets the stage for future interventions and to  
54 aid individuals seeking help from mental health professionals as a result of the ongoing pandemic.

55           Previous studies aimed to understand the relationship between various behavioral and  
56 psychosocial factors with psychological distress, depression, and anxiety symptoms (Filgueiras  
57 and Stults-Kolehmainen, 2021; Goularte et al., 2021) during the COVID-19 pandemic. The results  
58 suggested that individuals of female gender are more likely to show higher severity of psychiatric  
59 symptoms. Behaviors such as engaging in exercise and physical activity, eating healthy and  
60 engaging in tele-psychotherapy are associated with less mental health problems during quarantine.  
61 Those participants who reported the need to leave their homes to go to work, regardless of the  
62 nature of their jobs, showed more severe symptoms (Abreu et al., 2020; Filgueiras and Stults-  
63 Kolehmainen, 2021). Social isolation during quarantine has played a role in the development of  
64 mental illness, particularly for depression compared to anxiety (Passos et al., 2020). Additionally,  
65 low income, lower education and self-reported history of previous psychiatric illness were strongly  
66 associated with higher severity of symptoms (Goularte et al., 2021)

67           Broadly, prevalence can be defined as the proportion of people who have a condition at a  
68 given time point while incidence refers to the proportion of people who develop a condition  
69 throughout a period of time (Porta, 2008). The prevalence of symptoms of depression and anxiety  
70 has been examined during the first three months of quarantine due to COVID-19 (Goularte et al.,  
71 2021; Passos et al., 2020). At least one symptom of anxiety was found in 81.9% of a sample of  
72 1,996 Brazilians, whereas depression was reported by 68% of these volunteers (Goularte et al.,  
73 2021). Similar results were found in a Brazilian and Portuguese study with samples from the two  
74 countries. At least one symptom of anxiety was reported by 71.3% of the participants (mild anxiety

75 was present in 43.1%), 24.8% declared at least one depression symptom and 23.8% presented both  
76 depression and anxiety. Results also showed significant prevalence of other psychiatric symptoms:  
77 anger (64.5%), somatic symptoms (62.6%) and sleep problems (55.3%). Additionally, post-  
78 traumatic stress disorder (PTSD) symptoms were present in 65.8% of the sample (Goularte et al.,  
79 2021). Those findings are similar to previous results with other pandemics in different countries,  
80 such as the Middle-East Respiratory Syndrome (MERS) (Lee et al., 2018) and the Severe Acute  
81 Respiratory Syndrome (SARS) (Wu et al., 2005). Other researchers who investigated mental  
82 illness during the COVID-19 pandemic in other countries also found an increased prevalence, such  
83 as the U.S.A. (Liu et al., 2020), China (Huang and Zhao, 2020), India (Rehman et al., 2021),  
84 Germany (Bäuerle et al., 2020), Italy (Rossi et al., 2020), Turkey (Özdin and Bayrak Özdin, 2020)  
85 and Bangladesh (Islam et al., 2020). A variety of psychosocial factors may account for the pattern  
86 of results found for prevalence of mental health problems. For example, Lee et al. (2018) found  
87 that the risk of medical staff reporting PTSD symptoms during the MERS epidemic was higher  
88 due to exposure to contamination and their perception of personal health risk. Wu et al. (2005)  
89 reported similar findings during the SARS epidemic; they presented results pointing out that  
90 PTSD, depression, and anxiety symptoms were associated with perception of risk.

91 Filgueiras and Stults-Kolehmainen (2021) investigated the prevalence of severe  
92 depression, anxiety, and psychological stress among 360 Brazilian volunteers between March and  
93 April of 2020. They adopted the criteria of two standard deviations above the mean (2 SD) from  
94 the normative data of validated psychometric instruments. Results showed that 9.7% of the sample  
95 showed psychological distress above the clinical cut-off criteria, while 8.0% and 9.4% of  
96 participants were also above for depression and anxiety, respectively. The World Health  
97 Organization collected prevalence data in Brazil (World Health Organization, 2017) three years  
98 before the quarantine and found a lower prevalence of depression (5.8%). Nonetheless, anxiety  
99 was similar (9.3%), perhaps indicating some stability during quarantine. Importantly, data from  
100 these previous COVID-19 studies were gathered between March and May.

101 This study aimed to identify prevalence and incidence of severe psychological stress,  
102 depression, and anxiety among Brazilians during the COVID-19 pandemic. We chose to include  
103 distress, depression and anxiety because these are the are common psychological symptoms  
104 observed in other epidemics of acute respiratory syndromes (Brown et al., 2020; Lee et al., 2018;  
105 Wu et al., 2005) and during COVID-19 (Bäuerle et al., 2020; Filgueiras and Stults-Kolehmainen,

106 2021; Goularte et al., 2021; Huang and Zhao, 2020; Islam et al., 2020; Liu et al., 2020; Özdin and  
107 Bayrak Özdin, 2020; Passos et al., 2020; Rehman et al., 2021; Rossi et al., 2020). We hypothesize  
108 that the prevalence and incidence of stress, depression, and anxiety throughout the COVID-19  
109 pandemic will increase at each time point, and that scores for each of these conditions will also  
110 increase across time. Furthermore, we hypothesize that anxiety scores would increase higher in  
111 females compared to males. We built our hypothesis on previous evidence that suggests that  
112 stressful events combined with prevention measures against COVID-19 contamination, such as  
113 social isolation, quarantine, and confinement, may be associated with increased prevalence of  
114 mental illness (Brown et al., 2020; Liu et al., 2020). Additionally, our hypothesis is informed by  
115 previous literature showing higher health-anxiety and occurrence of anxiety disorder in females  
116 compared to males (Wang et al., 2021; Stults-Kolehmainen et al., 2014). Information about  
117 prevalence and incidence may support decision making about strategies and policies to address  
118 mental illness in places where the COVID-19 pandemic is still a problem.

119

## 120 **Methods**

### 121 *Participants*

122 This present longitudinal study assessed mental health outcomes in volunteers ( $N=103$ )  
123 during the initial stages of the COVID-19 pandemic in Brazil. We collected data over three periods  
124 of the COVID-19 pandemic curve (Pinto et al., 2020): Time 1, the first cases of community  
125 transmission (T1, March 20, 2020 to March 25, 2020); Time 2, the acceleration of the curve (T2,  
126 April 15, 2020 to April 20, 2020); and Time 3, the continued acceleration of the curve (T3, June  
127 25, 2020 to June 30, 2020). Inclusion criteria were being a Brazilian or a foreigner living in Brazil  
128 during the COVID-19 pandemic who adhered to quarantine measures. Exclusion criteria were  
129 being under the age of 18 years old ( $N=1$ ) and being a diagnosed psychiatric patient currently  
130 under treatment ( $N=6$ ), since those participants are already above clinical cut-off criteria and could  
131 show comorbid mental illnesses which would inflate prevalence numbers. Volunteers who  
132 reported being of non-binary gender ( $N=9$ ) were also excluded due to the low number of  
133 participants, which impaired statistical analyses; nonetheless, they were considered in this paper's  
134 discussion. Respondents were asked to complete a 45-minute online Google Forms questionnaire  
135 regarding demographic information and COVID-19-related mental health outcomes. The informed  
136 consent document was presented before the questionnaires, and the consent was a requirement for

137 participation. The Ethics Committee at Rio de Janeiro State University approved all procedures  
138 (report #2.990.087).

139

#### 140 *Measures*

141 We adopted three validated and normalized measures to ensure good quality of data; one  
142 instrument for each psychological dimension: psychological stress, depression, and anxiety.  
143 Severe stress, depression, and anxiety were identified if the respective mental health score was two  
144 standard deviations above the mean compared to normative data. Demographic information was  
145 collected through a simple questionnaire containing: gender (male, female and non-specific), age  
146 (in years) and risk for COVID-19 (“Do you have any current disease that increases your risk for  
147 COVID-19 lethality?”—yes/no). All instruments were presented in Brazilian Portuguese.

148 Perceived Stress Scale (PSS-10): The PSS-10 (Cohen and Williamson, 1998) is a 10-item  
149 measure that assesses the state of perceived stress in the last month. Participants respond to  
150 questions on a 5-point Likert-type scale that ranges from “0-never” to “4-very often” in regard to  
151 the frequency of those feelings or behaviors. Examples of questions are: “In the last month, how  
152 often have you been able to control irritations in your life?” and “In the last month, how often have  
153 you felt that you were unable to control the important things in your life?” Items 4, 5, 7 and 8 are  
154 reverse scored before summing to develop a single total score. Norms were developed for men and  
155 women separately (Cacciari et al., 2016), where the average for men was 20.7 (SD = 6.9) and the  
156 average for women was 23.2 (SD = 5.8). Scores above 34.5 and 34.8 for men and women,  
157 respectively, were considered to indicate severe stress.

158 Filgueiras Depression Inventory (FDI): The FDI (Filgueiras et al., 2014) is a 20-item  
159 inventory of words that are related to depression-like symptoms according to the DSM-V.  
160 Respondents link each of these words to their own feelings in the last fortnight. A Likert-type scale  
161 response set contains six categories of endorsement ranging from “0-not related to me at all” to  
162 “5-totally related to me”. Examples of items are “sadness”, “death”, “displeasure” and “guilty”.  
163 The total score is the sum of all items. The reference mean is 53.3 (SD = 22.6) with 99.1 or higher  
164 indicating a clinical cut-off point (2 SD) for depressive symptomology for both males and females.

165 State and Trait Anxiety Inventory—State subscale (STAI-S): The STAI-S is one in a set of  
166 two subscales developed to assess trait and state anxiety in adults (Spielberger et al., 1983). Trait  
167 anxiety refers to stable characteristics of an individual that facilitate the occurrence of anxiety-like

168 symptoms and behaviors. On the other hand, state anxiety comprises how one feels in the moment  
169 the inventory is completed. The state anxiety subscale has a 20-item structure that is answered  
170 with a 4-category Likert scale. The STAI-S responses range from “1-not at all” to “4-very much  
171 so”. Examples of items are “I feel calm”, “I feel nervous” and “I am presently worrying over  
172 possible misfortunes”. Items 1, 2, 5, 8, 10, 11, 15, 16, 19 and 20 are reverse scored before summing  
173 responses to provide a total score. Gender-specific reference means are 36.5 (SD = 14.3) for male  
174 respondents and 43.7 (SD = 12.7) for female respondents, with clinical cut-offs (> 2 SD) for severe  
175 acute anxiety being above 65 for men and above 69 for women (Pasquali et al., 1994)

176

### 177 *Data analysis*

178 All variables were normally distributed with skewness and kurtosis statistics within the  
179 range of -2.0 and 2.0. Prevalence was calculated using the percentage of participants above cut-  
180 off points in each period (T1, T2, and T3). Incidence of stress, depression, and anxiety was  
181 indicated by the percentage of participants whose scores were below cut-offs in the previous period  
182 data collection but were above these cut-offs in the next. We estimated three incidence  
183 percentages: (i) between times 1 and 2, (ii) 2 and 3 and (iii) 1 and 3. 95% confidence intervals  
184 were estimated as described by Altman et al. (2000). Furthermore, differences in PSS-10, FDI, and  
185 STATI-S between data-collection (time), gender, perception of risk (binary variable indicating  
186 whether individual indicated having a pre-existing comorbidity perceived to increase risk of  
187 COVID-19 fatality) and their interaction were evaluated using linear mixed effects models, where  
188 a random intercept was generated for each participant. Tukey post-hoc tests were used to find  
189 pairwise differences in main effects and interactions. Pearson correlations were performed to  
190 investigate linear associations between all mental health outcomes and age at each data collection  
191 point. Our results and interpretations were based on a significance set at  $p < .05$ . All analyses were  
192 performed using R Statistical Software (Version 4.02; R Foundation for Statistical Computing,  
193 498 Vienna, AT).

194

### 195 **Results**

196 Table 1 shows characteristics of our participants and descriptive data on mental health  
197 outcomes. This longitudinal study included 103 participants (32.3±10.7 years; 52% female). 44  
198 volunteers (42.7%) reported no chronic illness that increased lethality of COVID-19 due to



199 comorbidities at time 1 (64% female, 36% male). Of the 59 individuals who reported having higher  
 200 risk for lethality for COVID-19, 26 (44%) were female and 33 (56%) were male.

201  
 202 **Table 1.** Participant age, stress, depression, and anxiety scores stratified by time point, gender,  
 203 and perception of higher risk for COVID-19 lethality resulting from pre-existing illness

|                | Age    |       | Stress (PSS-10) |        |        | Depression (FDI) |        |        | Anxiety (STATI-S) |        |  |
|----------------|--------|-------|-----------------|--------|--------|------------------|--------|--------|-------------------|--------|--|
|                | Time   | Time  | Time            | Time   | Time   | Time             | Time   | Time   | Time              | Time   |  |
|                | 1      | 1     | 2               | 3      | 1      | 2                | 3      | 1      | 2                 | 3      |  |
| <b>Overall</b> |        |       |                 |        |        |                  |        |        |                   |        |  |
| Total          | 32.3   | 16.1  | 23.5            | 30.3   | 48.5   | 64.7             | 75.9   | 49.0   | 53.3              | 62.3   |  |
| (N=103)        | (10.8) | (8.7) | (8.4)           | (6.0)  | (20.5) | (30.2)           | (26.1) | (13.4) | (12.4)            | (13.4) |  |
| <b>Gender</b>  |        |       |                 |        |        |                  |        |        |                   |        |  |
| Female         | 31.9   | 16.9  | 23.9            | 31.6   | 50.5   | 65.9             | 81.7   | 50.3   | 53.7              | 66.7   |  |
| (N=49)         | (11.1) | (8.5) | (23.2)          | (28.9) | (19.2) | (27.1)           | (30.0) | (12.7) | (11.2)            | (11.8) |  |
| Male           | 32.7   | 15.2  | 23.2            | 28.9   | 46.2   | 63.5             | 69.5   | 47.6   | 52.8              | 57.4   |  |
| (N=54)         | (10.5) | (8.9) | (9.2)           | (6.4)  | (21.8) | (33.5)           | (22.5) | (14.1) | (13.7)            | (13.5) |  |
| <b>Risk</b>    |        |       |                 |        |        |                  |        |        |                   |        |  |
| No             | 30.1   | 17.6  | 23.6            | 31.2   | 51.0   | 69.4             | 84.0   | 51.6   | 54.0              | 68.8   |  |
| (N = 44)       | (11.2) | (8.9) | (8.7)           | (5.9)  | (21.1) | (29.3)           | (24.6) | (13.8) | (12.2)            | (8.6)  |  |
| Yes            | 33.3   | 15.0  | 23.5            | 29.6   | 49.6   | 61.3             | 69.9   | 47.1   | 52.7              | 57.4   |  |
| (N = 59)       | (10.4) | (8.4) | (8.2)           | (6.1)  | (20.0) | (30.6)           | (25.8) | (12.9) | (12.6)            | (14.5) |  |

204  
 205 The prevalence of severe stress symptoms was 1.9% (95% CI [0.5, 6.8]) at T1, 7.8% (95%  
 206 CI [4.0, 14.6]) at T2 and 28.2% (95% CI [20.4, 37.5]) at T3. The prevalence of severe depression  
 207 symptoms was 0% (95% CI [0, 3.6]) at T1, 23.3% (95% CI [16.2, 32.3]) at T2 and 25.2% (95%  
 208 CI [17.8, 34.4]) at T3. The prevalence of severe anxiety-state symptoms was 10.7% (95% CI [6.1,  
 209 18.1]) at T1, 11.7% (95% CI [6.8, 19.3]) at T2 and 45.6% (95% CI [36.3, 55.2]) at T3. We observed  
 210 greater prevalence of mental illness across the COVID-19 pandemic, as well as overlap between  
 211 stress, depression, and anxiety. The progression of mental illness and the overlap between the  
 212 conditions can be seen in Figure 1. Of note, there was no prevalence of severe depression, anxiety,  
 213 or stress in 89% of individuals at T1, which dropped to 35% by T3.



214

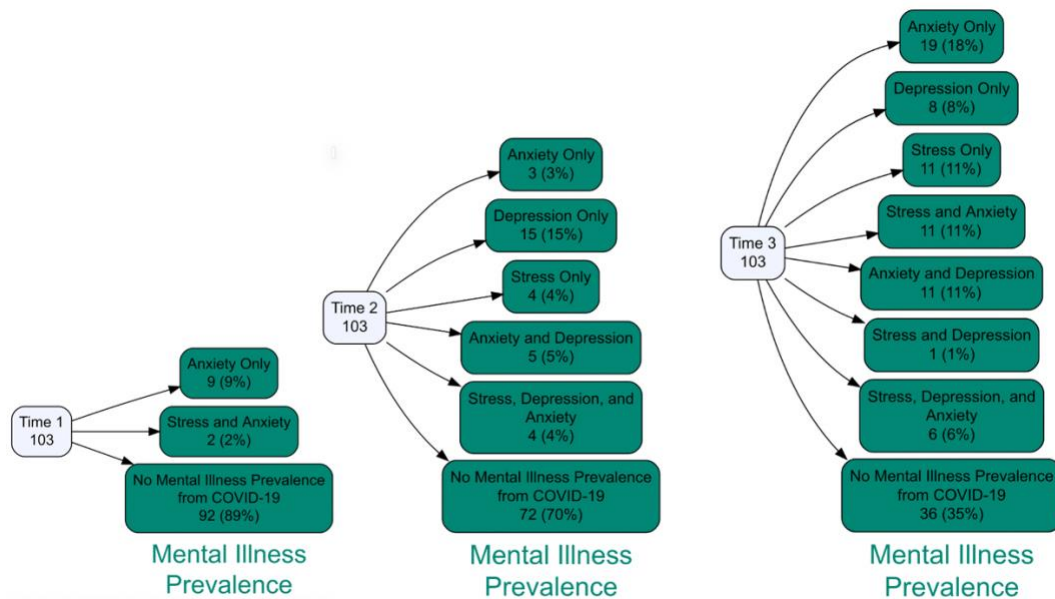

215

216 **Figure 1.** Prevalence of anxiety-alone, depression-alone, stress-alone, anxiety and depression,  
 217 anxiety and stress, depression, and stress, all three, and neither at each time point of the COVID-  
 218 19 pandemic

219

220 The results of the linear-mixed effects models for stress, anxiety, and depression are  
 221 displayed in Figure 2. A main effect of time was found for PSS-10 ( $F(2, 198) = 103.5, p < .0001$ ),  
 222 however, there was no main effect of gender or risk on PSS-10 as well as no interactions. Tukey  
 223 post-hoc tests revealed PSS-10 to be significantly higher at T3 compared to T2 ( $t(198) = -7.13, p$   
 224  $< .0001$ ) and T1 ( $t(198) = -14.4, p < .0001$ ), while T2 was found to be significantly higher than T1  
 225 ( $t(198) = -7.23, p < .0001$ ). A main effect of time was found for FDI ( $F(2, 198) = 52.9, p < .0001$ )  
 226 however, there was no effect of gender or risk perception on PSS-10 in addition no interactions.  
 227 FDI was found to be significantly higher at T3 compared to T2 ( $t(198) = -7.43, p = .0001$ ) and T1  
 228 ( $t(198) = -10.3, p < .0001$ ). Moreover, T2 was found to be significantly higher than T1 ( $t(198) = -$   
 229  $6.02, p < .0001$ ). A main effect of time ( $F(2, 198) = 55.0, p < .0001$ ) and risk perception ( $F(1, 99)$   
 230  $= 5.55, p = .021$ ) was found for STAI-S. Tukey post-hoc comparisons revealed that STAI-S was  
 231 significantly higher at T3 compared to T2 ( $t(198) = -7.34, p < .0001$ ) and T1 ( $t(198) = -10.2, p <$   
 232  $.0001$ ), while T2 was found to be significantly higher than T1 ( $t(198) = -2.82, p = .015$ ).  
 233 Furthermore, there was a significant difference between risk perception levels where individuals  
 234 without a comorbidity had higher STAI-S scores than individuals with a comorbidity ( $t(99) = 2.36,$

235  $p < .02$ ), as is seen in Figure 3. A time-by-risk interaction was found for STAI-S scores ( $F(2,198)$   
236  $= 5.96, p = .003$ ), and a Tukey post-hoc comparison showed that individuals without a comorbidity  
237 had higher STAI-S scores than those with a comorbidity ( $68.8 \pm 8.6$  vs.  $57.4 \pm 14.4$ ;  $t(209) = 3.81, p$   
238  $= .003$ ). Finally, a time-by-gender interaction was found for anxiety ( $F(2,198) = 3.17, p = .044$ ),  
239 and a Tukey post-hoc comparison showed that females had higher anxiety scores than males at T3  
240 ( $66.7 \pm 11.8$  vs.  $57.4 \pm 13.5$ ;  $t(209) = 2.94, p = .04$ ).

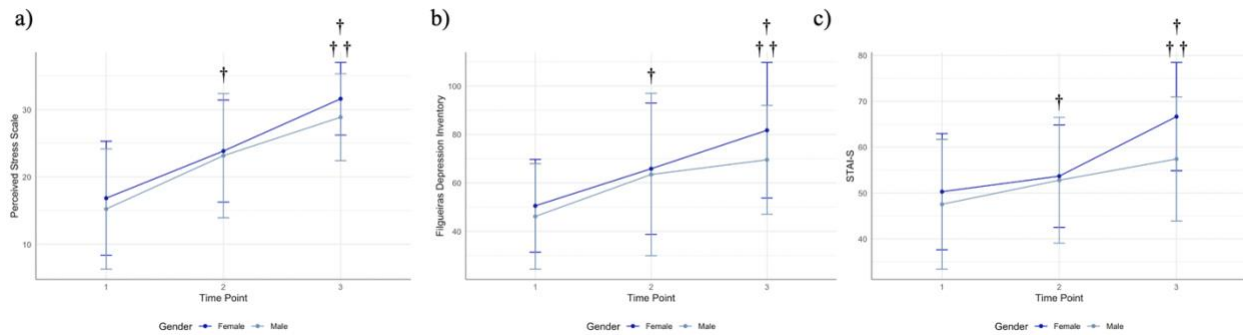

241  
242 **Figure 2.** Stress, depression, and anxiety scores across each time point and stratified by gender. †  
243 indicates statistical difference from T1 ( $p < .05$ ). †† indicates statistical difference from T2 ( $p <$   
244  $.05$ )  
245

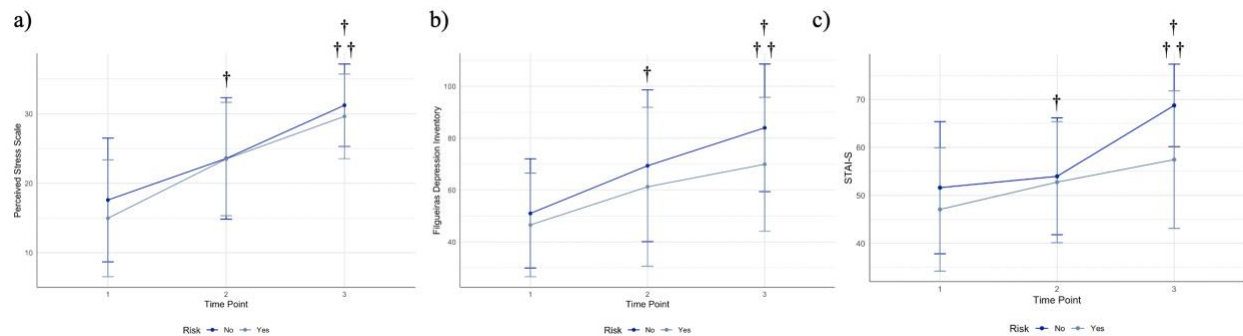

246  
247 **Figure 3.** Stress, depression, and anxiety scores across each time point and stratified by binary  
248 perception of risk. † indicates statistical difference from T1 ( $p < .05$ ). †† indicates statistical  
249 difference from T2 ( $p < .05$ )  
250

251 Figure 4 depicts the correlation matrices between age and mental health outcomes at each  
252 data collection point. At T1, all correlations were statistically significant ( $p \leq .05$ ) and ranged from  
253  $r = -.21$  to  $r = .91$ . Age was significantly and inversely correlated with all mental health outcomes.

254 Stress was strongly and positively correlated to both depression ( $r = .83$ ) and anxiety ( $r = .91$ ).  
255 Furthermore, there was a strong relationship between depression and anxiety ( $r = .82$ ). At T2, age  
256 was only significantly associated with depression ( $r = -.45$ ,  $p < .05$ ). Moreover, only stress and  
257 anxiety were associated, though the relationship was strong ( $r = .88$ ,  $p < .05$ ). At the T3, there were  
258 no significant associations between any mental health outcomes or age.  
259

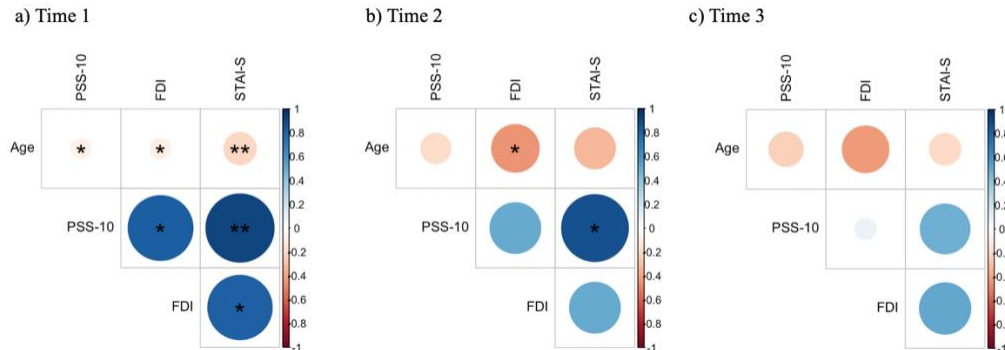

260  
261 **Figure 4.** Pearson correlation matrix depicting relationship between age, stress, anxiety, and  
262 depression at each time point. Correlations conducted for each time point separately, a) T1, b) T2,  
263 and c), T3. \* denotes  $p < .05$ , \*\* denotes  $p < .01$ , \*\*\* denotes  $p < .001$ . Darkness, color, and size  
264 of circle depict strength of correlation from  $r = -1$  to 1.

## 265 Discussion

266 Our findings highlight the increase of psychological symptoms throughout the early phase  
267 COVID-19 pandemic based on both prevalence and incidence. Prevalence of severe stress  
268 symptoms increased from 1.9% (T1) to 28.2% (T3). The same phenomenon occurred with  
269 depression, increasing from 0.0% (T1) to 25.2% (T3), and with anxiety, increasing from 10.7%  
270 (T1) to 45.6% (T3). Furthermore, our results show that the largest increase in incidence of stress  
271 and anxiety occurred between T2 and T3 (23.3% and 39.8%, respectively), while the largest  
272 increase in depression incidence occurred between T1 and T2 (15.5%). In 2017, the World Health  
273 Organization gathered worldwide data regarding mental health and found a prevalence of 5.8% for  
274 depression and 9.3% for anxiety among Brazilians (World Health Organization, 2017). Our results  
275 suggest that this sample had a lower prevalence of depression at the start of the COVID-19  
276 pandemic, compared to the WHO's data. Nevertheless, the acceleration phases of the epidemic  
277 curve showed higher depression prevalence compared to the WHO, by a magnitude of 17.5% and  
278

279 19.4% at T2 and T3, respectively. Previous literature shows that depressive individuals during the  
280 COVID-19 pandemic tend to present melancholic, social isolation, grief and denying symptoms  
281 (Goularte et al., 2021; Huang and Zhao, 2020; Liu et al., 2020). On the other hand, regarding  
282 anxiety, time 1 of our data collection presented higher levels of prevalence by a magnitude of 1.4%  
283 when compared with those results from WHO. Furthermore, the second measurement exceeded  
284 the WHO's previous data by a magnitude of 2.4% while the third measurement exceeded the  
285 WHO's previous data by a magnitude of 36.3%.

286 The incidence of stress, depression, and anxiety among people in quarantine is coherent  
287 with other studies. Brown et al. (2020) reviewed previous data regarding mental health during  
288 other respiratory syndrome epidemics and concluded that stress, anxiety, anger, and depression are  
289 the most common psychiatric symptoms, and they tend to be more severe during quarantine. Our  
290 results corroborate with previous findings (Brown et al., 2020; World Health Organization, 2017)  
291 and add new information regarding the time period of quarantine that people may be in greatest  
292 need of help. Symptoms of stress, depression, and anxiety increased from the start of the pandemic  
293 to the continued acceleration phase recorded at time 3. Nonetheless, depression symptoms behaved  
294 differently; it began with a smaller prevalence compared to normative data (5.8%), then rose to  
295 23.3% at time 2 and 25.2% at time 3.

296 Our analysis showed that gender had a significant interaction with time for anxiety, where  
297 females had higher anxiety scores than males by the third collection point ( $66.7 \pm 11.8$  vs.  
298  $57.4 \pm 13.5$ ). These results are consistent with Özdin and Bayrak Özdin (2020), who found that  
299 females had significantly higher anxiety and health anxiety, compared to male counterparts.  
300 Furthermore, Wang et al. (2021) found that females had 3.01 times the anxiety risk than males  
301 during the COVID-19 pandemic. These findings differ slightly from ours, as we found no  
302 significant difference in depression between genders. We speculate that these between-sex  
303 differences are explained by a higher likelihood for health anxiety in women compared to men, a  
304 higher incidence of lifetime anxiety disorder in women compared to men, and a larger proportion  
305 of healthcare workers being women (Xiong et al., 2020; Bobevski et al., 2016; Stults-Kolehmainen  
306 et al., 2014).

307 In this study, we found that there was a main effect of time for stress, anxiety, and  
308 depression, where the severity of each mental health condition became worse throughout time.  
309 Furthermore, all conditions increased significantly at each time interval. For example, depression

310 at time 3 was significantly more severe than depression at time 2, which was more severe than  
311 depression at time 1; this effect was seen for anxiety and stress as well. We did not find a significant  
312 main effect of gender or perception of risk due to comorbidity on stress or depression. However,  
313 a main effect of risk perception was found on anxiety where individuals without a comorbidity  
314 that increased perception of lethality risk had lower anxiety than those who had a comorbidity. A  
315 time-by-gender interaction was also found where females had higher scores of anxiety at time 3  
316 compared to males. Finally, a time-by-risk interaction was found where individuals with a  
317 comorbidity had lower anxiety scores than those without a comorbidity at time 3. The  
318 comorbidities that we asked participants can all be described as chronic illnesses, which include  
319 obesity, diabetes, high blood pressure and other cardiac and respiratory conditions (Pinto et al.,  
320 2020). We hypothesize that the reason that these individuals had lower anxiety scores is due to an  
321 increase in resiliency to stressful life events in this population. This hypothesis is consistent with  
322 previous literature, as Ghanei Gheshlagh et al. (2016) found that individuals with chronic illness  
323 have high resiliency scores, which increase with the disease lethality. These authors propose that  
324 high resiliency in these samples is developed adaptively, to maintain control of their own life, to  
325 adapt to life changes, and to remain in treatment, and for other reasons. Therefore, it is plausible  
326 that this sample of people with chronic illness/comorbidities was less anxious because of the  
327 COVID-19 pandemic as they had higher pre-existing resiliency than individuals without chronic  
328 illness.

329 We found that severity of all mental illness conditions was positively associated with each  
330 other at time one and negatively associated with age at time 1. At time 2, the only significant  
331 association was between age and depression. Subsequently, there were no significant associations  
332 between any of the conditions with each other or age at time 3. We hypothesize that the start of  
333 the pandemic provided a highly salient event that provoked similar difficulties across the sample.  
334 This universally shared experience may have led to mental health changes that were largely  
335 associated. However, as the pandemic progressed, individuals experienced different difficulties.  
336 For example, some may have experienced the loss of multiple loved ones, others may have lost  
337 employment, some may have endured the lockdown in solitude. Therefore, it is plausible that the  
338 conditions became dissociated as individuals developed unique concerns based on their distinct  
339 circumstance throughout the pandemic.

340 Our findings showed negative associations between age and mental health outcomes, which  
341 is consistent with other literature. More specifically, Huang and Zhao (2020) reported similar  
342 results; they found that younger Chinese presented higher scores in anxiety and depression. The  
343 same phenomenon occurred in both Germany (Bäuerle et al., 2020) and the U.S.A. (Liu et al.,  
344 2020) suggesting that, in fact, youth felt more impacted by the COVID-19 pandemic, which lead  
345 to worse mental health. Loneliness, anger and hopelessness were dimensions linked to depression  
346 and anxiety among young adults in U.S.A. (Liu et al., 2020) and among Brazilians (Goularte et  
347 al., 2021). Those symptoms affect younger individuals greater; thus, one might expect to observe  
348 a decrease of mental illness scores with increasing age.

349 We also collected data from non-binary gender participants ( $N=9$ ). Even though only three  
350 of these volunteers answered our questionnaire at time1 and only one answered at time 2, it was  
351 possible to calculate an average and standard deviation for them at time 3, when most of them  
352 participated ( $N=8$ ). At time 3, the average for perceived psychological stress in non-binary  
353 individuals was  $26.3\pm 12.4$  versus  $31.6\pm 28.9$  among females and  $28.9\pm 6.4$  among males.  
354 Depression was  $65.1\pm 29.7$  versus  $81.7\pm 30.0$  and  $69.5\pm 22.5$  among females and males,  
355 respectively. Lastly, anxiety was  $59.4\pm 17.5$  among non-binary versus  $66.7\pm 11.8$  and  $57.4\pm 13.5$   
356 among females and males, respectively. Even though it is not possible to perform a trustworthy  
357 null-hypothesis test due to the low number of non-binary participants, it seems that their scores  
358 were typically higher than other genders. The matter of mental health among binary and non-binary  
359 individuals is still a debatable, although researchers agree that cisgender (those whose gender is  
360 the same as the assigned at birth) tend to show better psychological outcomes when compared to  
361 transgender binary and non-binary participants (Rimes et al., 2019; Thorne et al., 2019).  
362 Nevertheless, it seems that stressful events, such as COVID-19 pandemic might be worse for those  
363 individuals. Specific studies should be conducted within this population to reach a more precise  
364 conclusion.

365 Limitations include the self-reported nature of the data, which was used to analyze mental  
366 health outcomes. Further, participants were asked if they had an illness which increased fatality  
367 risk for COVID-19 and were given a few examples of such conditions (i.e., obesity, diabetes, high  
368 blood pressure and other cardiac and respiratory conditions). Therefore, outside of these categories  
369 given to participants, the answer to this question relies on their knowledge of comorbidities that  
370 increase fatality risk for COVID-19 and their perception to the risk. For example, an individual



371 with Vitamin D deficiency may be unaware of their status and state that they do not have any  
372 condition that increases risk for COVID-19 lethality, even though this condition increases fatality  
373 risk for COVID-19 (World Health Organization, 2017; Pugach and Pugach, 2021). Our study  
374 sheds light on changes in psychological stress, depression, and anxiety throughout early course of  
375 the COVID-19 pandemic curve in 2020. Prevalence, incidence, and severity increased for stress,  
376 anxiety, and depression. The largest increase in stress and anxiety incidence occurred between T2  
377 and T3, while the largest increase in depression incidence occurred between T1 and T2. Further,  
378 our results suggests that as time progressed, scores of stress and depression significantly increased  
379 at similar rates in both genders and risk groups. However, anxiety scores increased at a higher rate  
380 in females and interestingly, individuals without a comorbidity that increased fatality risk.  
381 Additionally, we found a substantial decrease in the proportion of people that did not have a severe  
382 mental health condition.  
383  
384



385 **References**

- 386 Abreu JMd, Souza RAd, Viana-Meireles LG, et al. (2020) Effects of physical activity and  
387 exercise on well-being in the context of the Covid-19 pandemic. *medRxiv*. DOI:  
388 10.1101/2020.06.08.20125575. 2020.2006.2008.20125575.
- 389 Altman D, Machin D, Bryant T, et al. (2000) *Statistics with Confidence, second edition*. London:  
390 British Medical Journal, pp.28-29  
391 45-46.
- 392 Bäuerle A, Teufel M, Musche V, et al. (2020) Increased generalized anxiety, depression and  
393 distress during the COVID-19 pandemic: a cross-sectional study in Germany. *Journal of*  
394 *Public Health* 42(4): 672-678.
- 395 Bobevski I, Clarke DM and Meadows G (2016) Health Anxiety and Its Relationship to Disability  
396 and Service Use: Findings From a Large Epidemiological Survey. *Psychosom Med* 78(1):  
397 13-25.
- 398 Brazil Ministry of Health (2021) *Painel Coronavírus*. Available at: <https://covid.saude.gov.br/>  
399 (accessed September 7).
- 400 Brown E, Gray R, Lo Monaco S, et al. (2020) The potential impact of COVID-19 on psychosis:  
401 A rapid review of contemporary epidemic and pandemic research. *Schizophrenia*  
402 *Research* 222: 79-87.
- 403 Cacciari P, Haddad MCL and Dalmas JC (2016) Worker Stress Level with Functional  
404 Rearrangement and Readaption in a Public State University. *Enfermagem* 25(2).
- 405 Cohen S and Williamson G (1998) Perceived stress in a probability sample of the United States.  
406 In: Spacapam S and Oskamp S (eds) *The social psychology of health: Claremont*  
407 *Symposium on applied social psychology*. Newbury Park, CA: Sage, pp.31-67.
- 408 Filgueiras A, Hora G, Fioravanti-Bastos ACM, et al. (2014) Development and psychometric  
409 properties of a novel depression measure. *Temas em Psicologia* 22: 249-269.
- 410 Filgueiras A and Stults-Kolehmainen M (2020) Factors linked to changes in mental health  
411 outcomes among Brazilians in quarantine due to COVID-19. *medRxiv*. DOI:  
412 10.1101/2020.05.12.20099374. 2020.2005.2012.20099374.
- 413 Filgueiras A and Stults-Kolehmainen M (2021) Risk Factors for Potential Mental Illness Among  
414 Brazilians in Quarantine Due To COVID-19. *Psychological Reports* 0(0):  
415 0033294120976628.

- 416 Ghanei Gheshlagh R, Sayehmiri K, Ebadi A, et al. (2016) Resilience of Patients With Chronic  
417 Physical Diseases: A Systematic Review and Meta-Analysis. *Iranian Red Crescent*  
418 *medical journal* 18(7): e38562-e38562.
- 419 Goularte JF, Serafim SD, Colombo R, et al. (2021) COVID-19 and mental health in Brazil:  
420 Psychiatric symptoms in the general population. *Journal of Psychiatric Research* 132:  
421 32-37.
- 422 Huang Y and Zhao N (2020) Generalized anxiety disorder, depressive symptoms and sleep  
423 quality during COVID-19 outbreak in China: a web-based cross-sectional survey.  
424 *Psychiatry Research* 288: 112954.
- 425 Islam MA, Barna SD, Raihan H, et al. (2020) Depression and anxiety among university students  
426 during the COVID-19 pandemic in Bangladesh: A web-based cross-sectional survey.  
427 *PLOS ONE* 15(8): e0238162.
- 428 Lee SM, Kang WS, Cho A-R, et al. (2018) Psychological impact of the 2015 MERS outbreak on  
429 hospital workers and quarantined hemodialysis patients. *Comprehensive Psychiatry* 87:  
430 123-127.
- 431 Liu CH, Zhang E, Wong GTF, et al. (2020) Factors associated with depression, anxiety, and  
432 PTSD symptomatology during the COVID-19 pandemic: Clinical implications for U.S.  
433 young adult mental health. *Psychiatry Research* 290: 113172.
- 434 Özdin S and Bayrak Özdin Ş (2020) Levels and predictors of anxiety, depression and health  
435 anxiety during COVID-19 pandemic in Turkish society: The importance of gender.  
436 *International Journal of Social Psychiatry* 66(5): 504-511.
- 437 Pasquali L, Pinelli Júnior B and Solha AC (1994) Contribution to the validity and norms of a-  
438 trait scale. *Psicol. teor. pesqui* 10(3): 411-420.
- 439 Passos L, Prazeres F, Teixeira A, et al. (2020) Impact on Mental Health Due to COVID-19  
440 Pandemic: Cross-Sectional Study in Portugal and Brazil. *International Journal of*  
441 *Environmental Research and Public Health* 17(18): 6794.
- 442 Pinto AS, Santos Júnior EGD, Rodrigues CA, et al. (2020) Covid-19 growth rate analysis:  
443 application of a low-complexity tool for understanding and comparing epidemic curves.  
444 *Rev Soc Bras Med Trop* 53: e20200331.
- 445 Porta M (2008) *A Dictionary of Epidemiology*. Oxford University Press, USA.

- 446 Pugach IZ and Pugach S (2021) Strong correlation between prevalence of severe vitamin D  
447 deficiency and population mortality rate from COVID-19 in Europe. *Wien Klin*  
448 *Wochenschr* 133(7-8): 403-405.
- 449 Rehman U, Shah Nawaz MG, Khan NH, et al. (2021) Depression, Anxiety and Stress Among  
450 Indians in Times of Covid-19 Lockdown. *Community Mental Health Journal* 57(1): 42-  
451 48.
- 452 Rimes KA, Goodship N, Ussher G, et al. (2019) Non-binary and binary transgender youth:  
453 Comparison of mental health, self-harm, suicidality, substance use and victimization  
454 experiences. *International Journal of Transgenderism* 20(2-3): 230-240.
- 455 Rossi R, Soggi V, Talevi D, et al. (2020) COVID-19 Pandemic and Lockdown Measures Impact  
456 on Mental Health Among the General Population in Italy. *Frontiers in Psychiatry*  
457 11(790).
- 458 Spielberger C, Gorsuch R, Lushene R, et al. (1983) *Manual for the State-Trait Anxiety Inventory*  
459 *(Form Y1 – Y2)*.
- 460 Stults-Kolehmainen MA, Tuit K and Sinha R (2014) Lower cumulative stress is associated with  
461 better health for physically active adults in the community. *Stress* 17(2): 157-168.
- 462 Thorne N, Witcomb GL, Nieder T, et al. (2019) A comparison of mental health symptomatology  
463 and levels of social support in young treatment seeking transgender individuals who  
464 identify as binary and non-binary. *International Journal of Transgenderism* 20(2-3): 241-  
465 250.
- 466 Wang Y, Di Y, Ye J, et al. (2021) Study on the public psychological states and its related factors  
467 during the outbreak of coronavirus disease 2019 (COVID-19) in some regions of China.  
468 *Psychol Health Med* 26(1): 13-22.
- 469 World Health Organization (2017) Depression and other common mental disorders: global health  
470 estimates. Reportno. Report Number|, Date. Place Published|: Institution|.
- 471 Wu KK, Chan SK and Ma TM (2005) Posttraumatic stress, anxiety, and depression in survivors  
472 of severe acute respiratory syndrome (SARS). *Journal of Traumatic Stress* 18(1): 39-42.
- 473 Xiong J, Lipsitz O, Nasri F, et al. (2020) Impact of COVID-19 pandemic on mental health in the  
474 general population: A systematic review. *Journal of affective disorders* 277: 55-64.  
475  
476

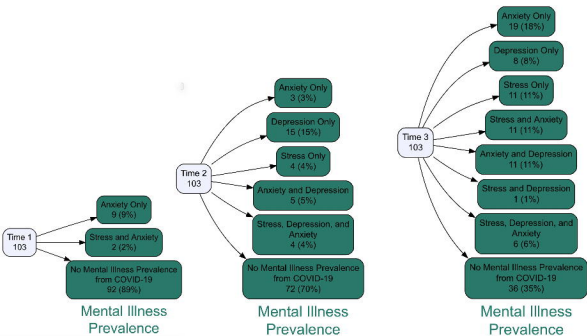

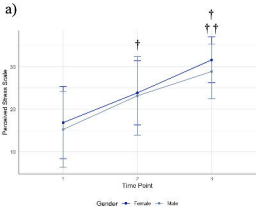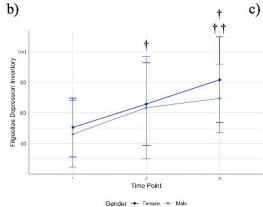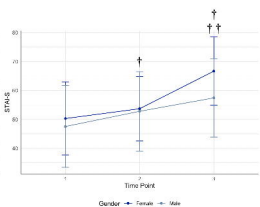

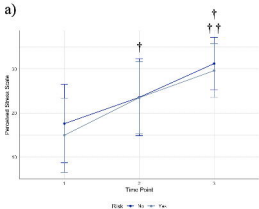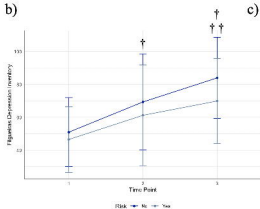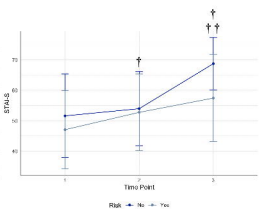

a) Time 1

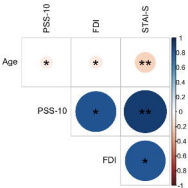

b) Time 2

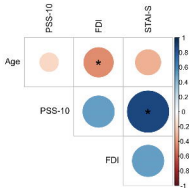

c) Time 3

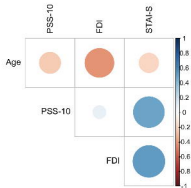

Source: https://www.medrxiv.org/content/10.1101/2021.09.07.21263246v2.full.pdf
